# Supplementary material for: Dimensional accuracy of 3D printing navigation templates of chemical-based sterilisation
Source: PubMed Central journal article supplement (PMC8786919; doi:10.1038/s41598-022-05412-7), 2022-01-24
Supplement: 41598_2022_5412_MOESM1_ESM.pdf [file 41598_2022_5412_MOESM1_ESM.pdf]

## Group A:

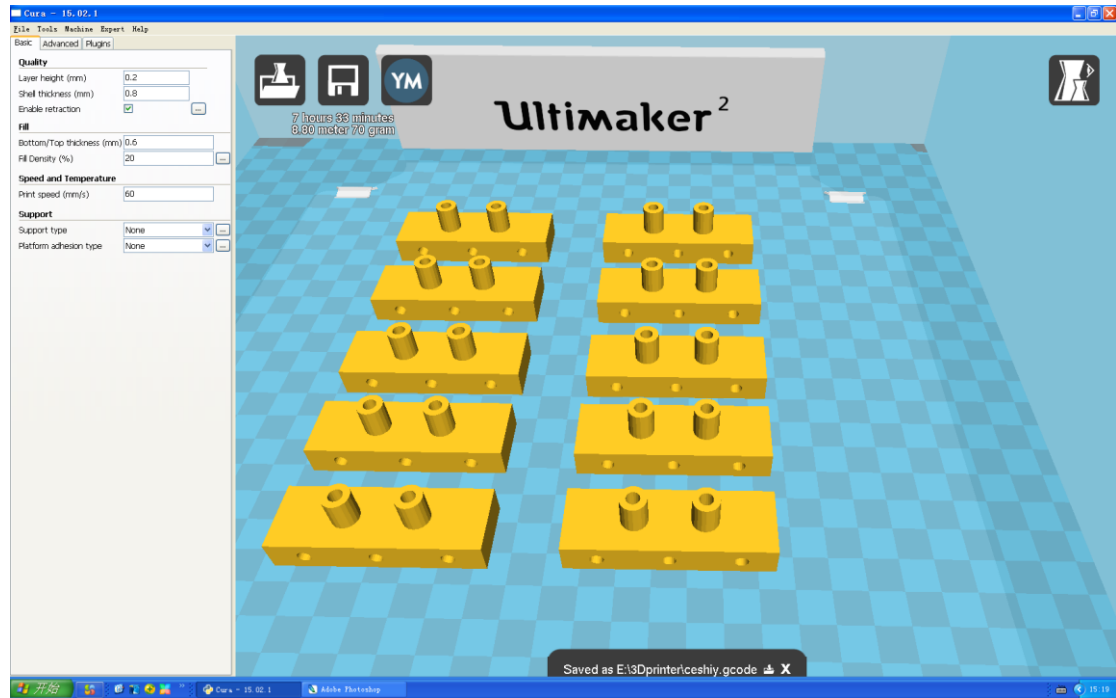

Figure S1. Slice using CURA software.

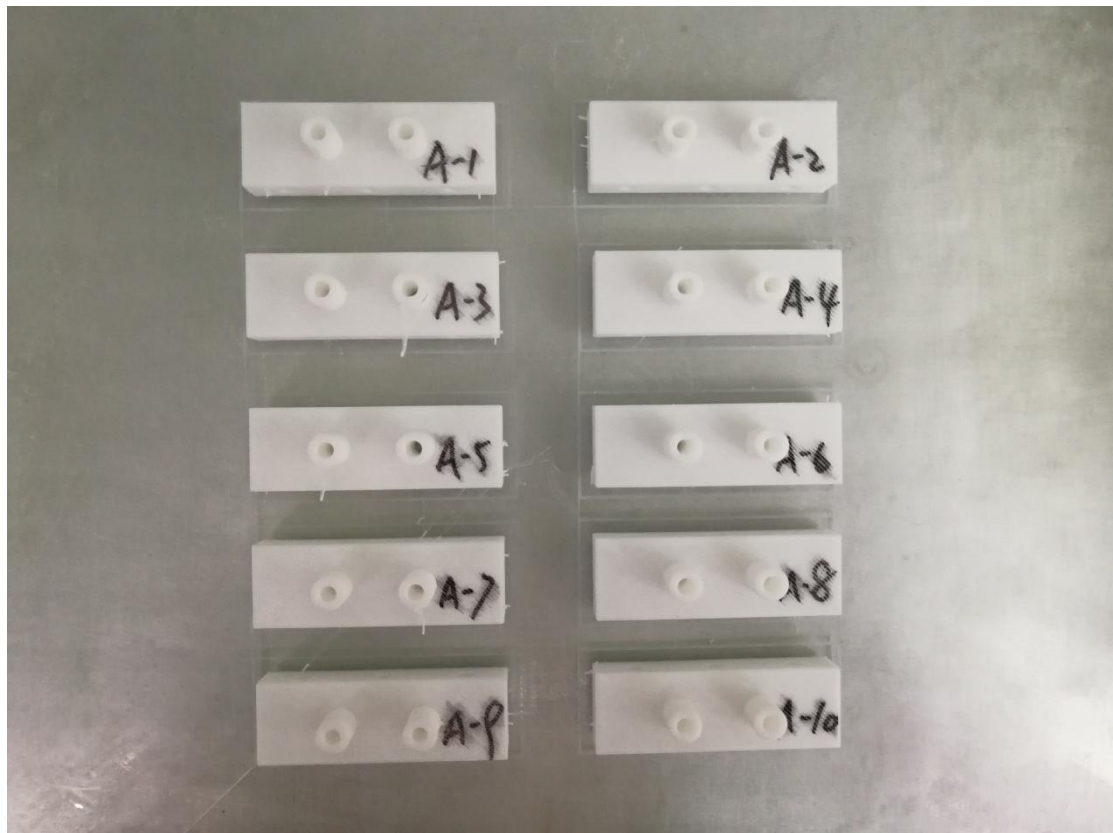

Figure S2. 3D printing was complete.

## Group B:

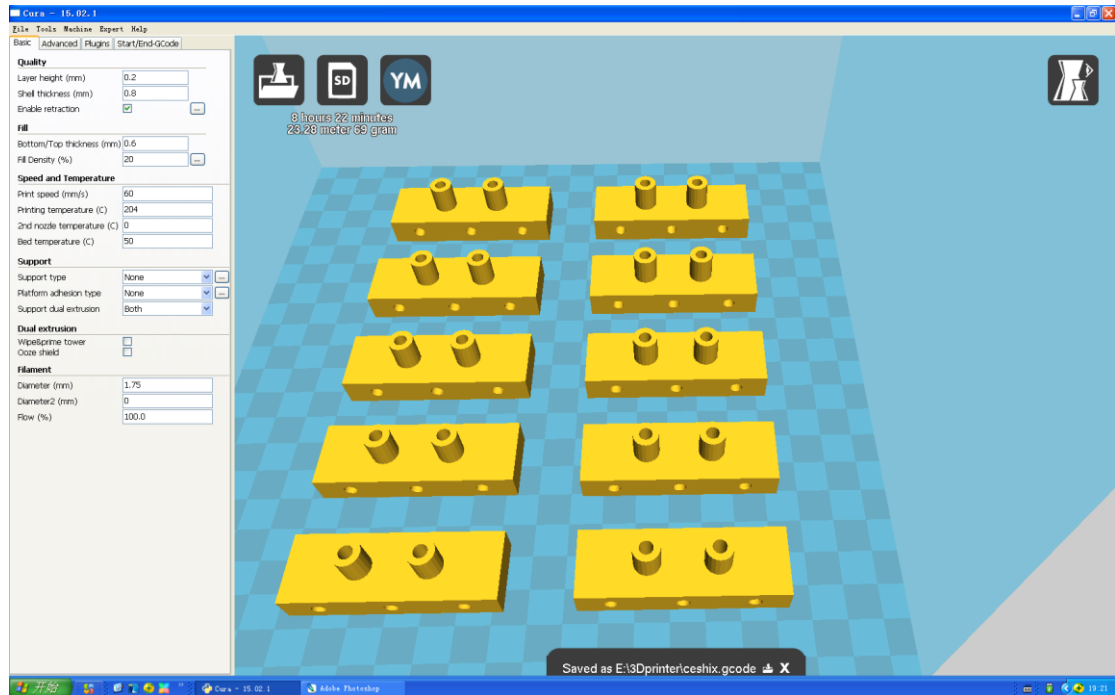

Figure S3. Slice using CURA software.

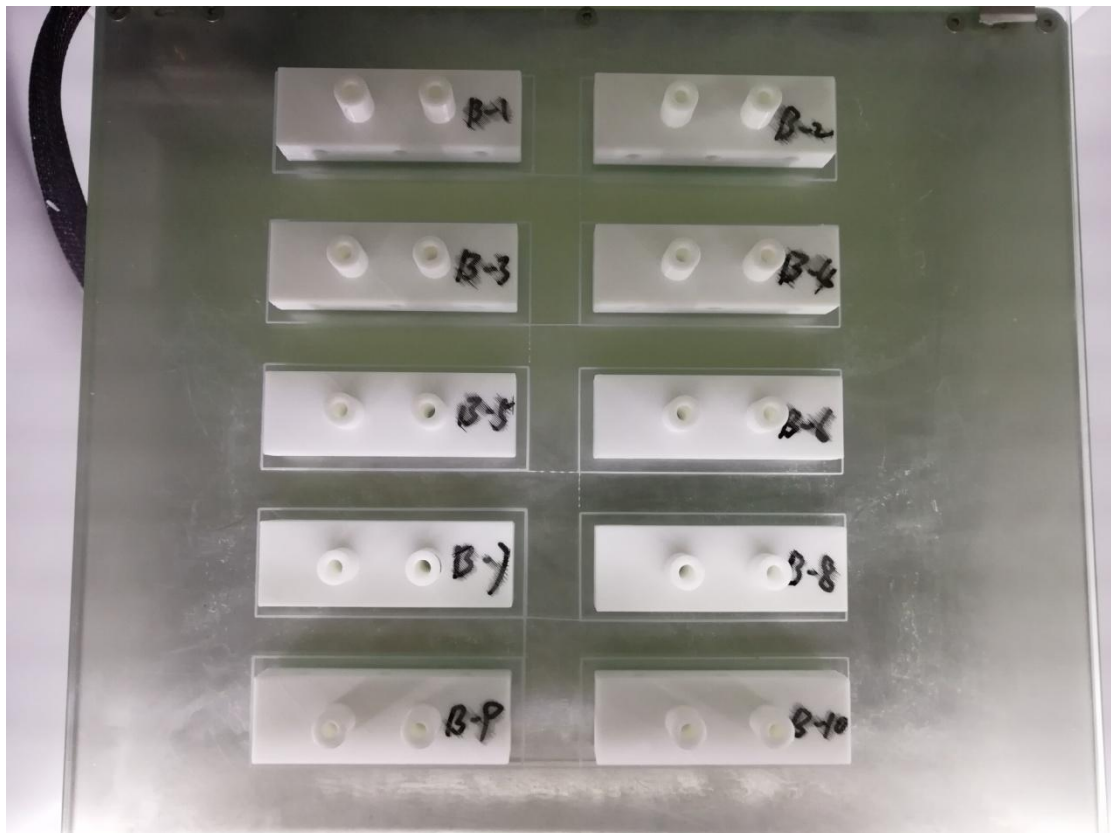

Figure S4. 3D printing was complete

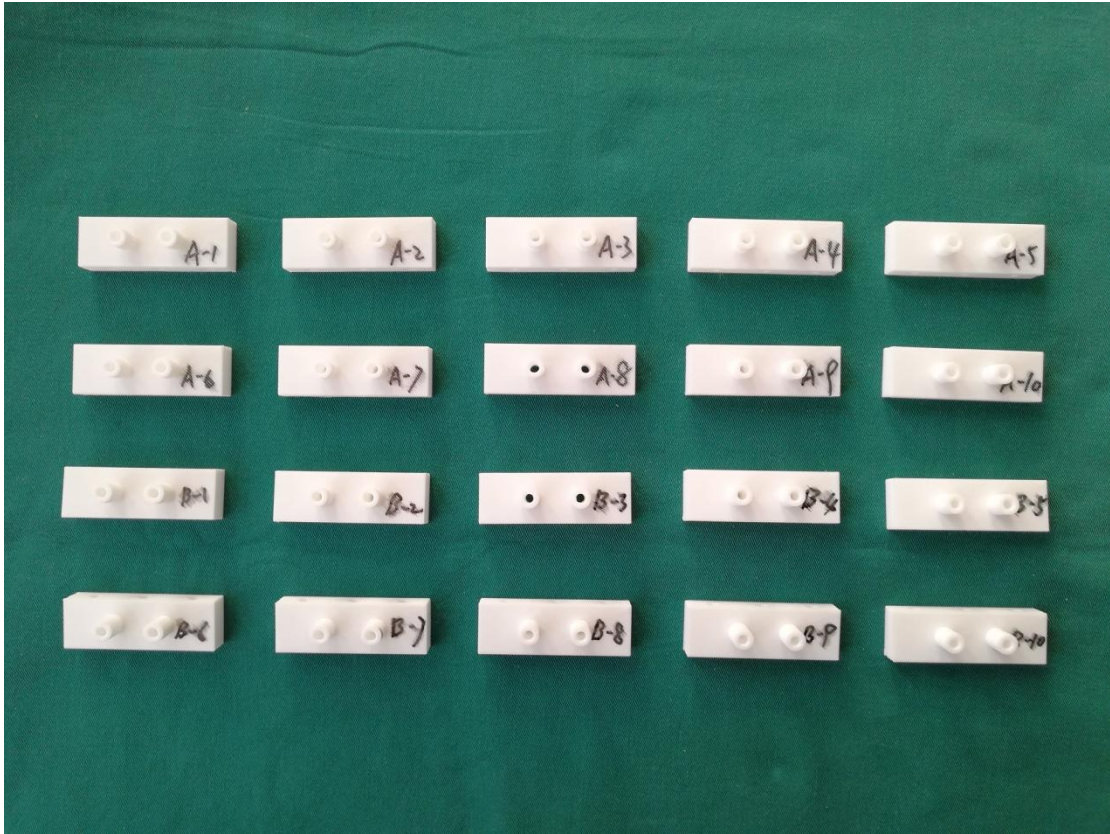

Figure S5. All modules of Group A and Group B.

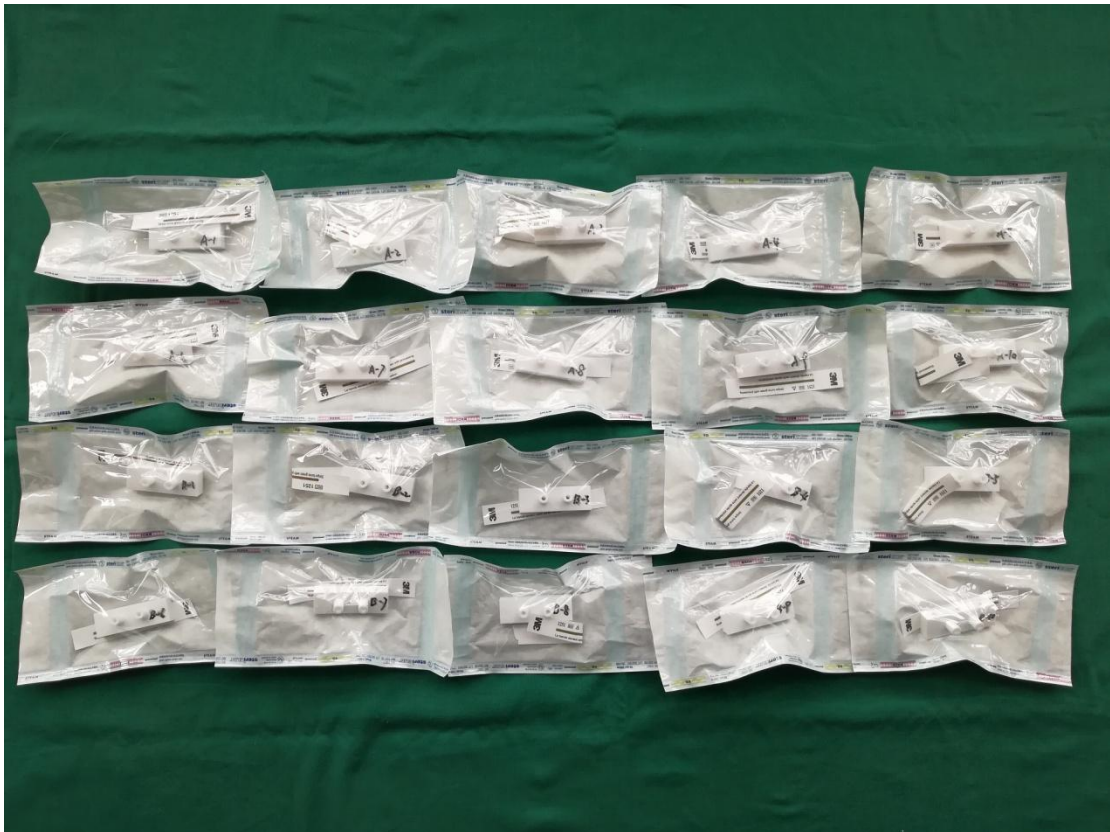

Figure S6. EO sterilization

## Group C:

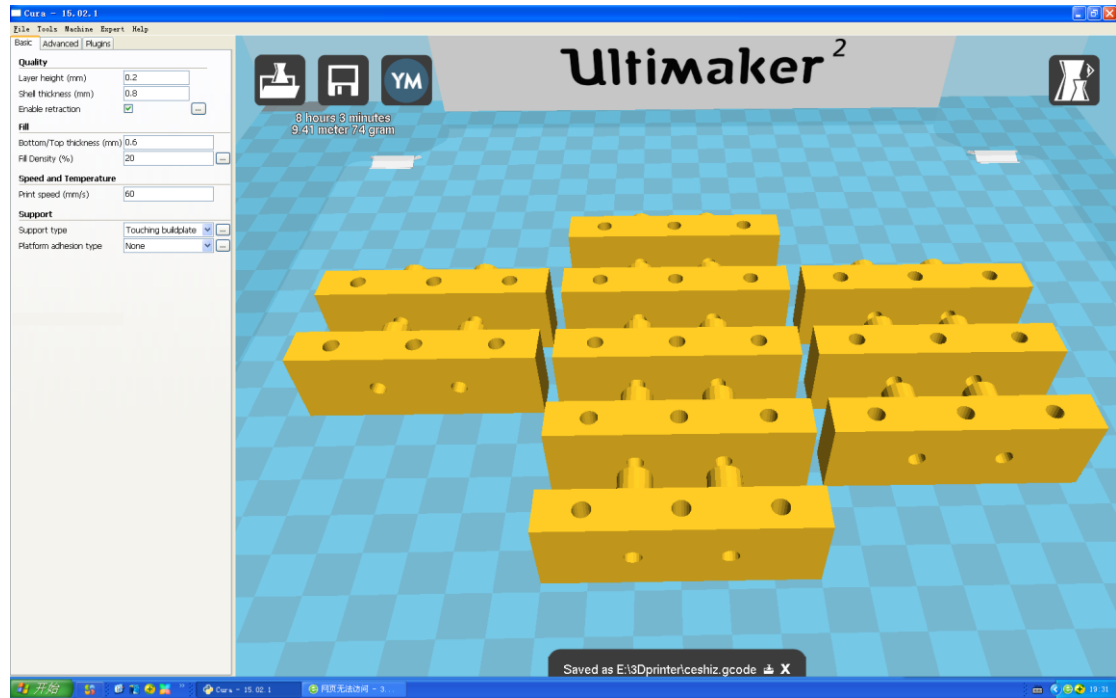

Figure S7. Slice using CURA software.

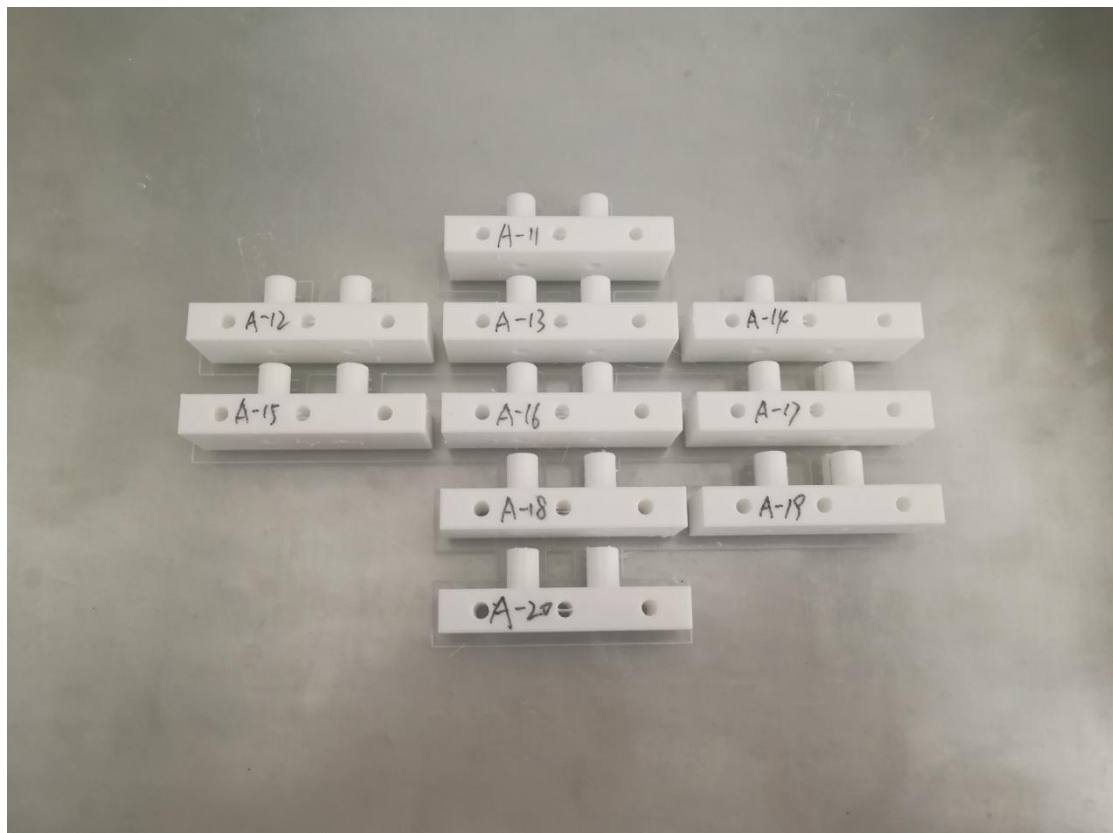

Figure S8. 3D printing was complete.

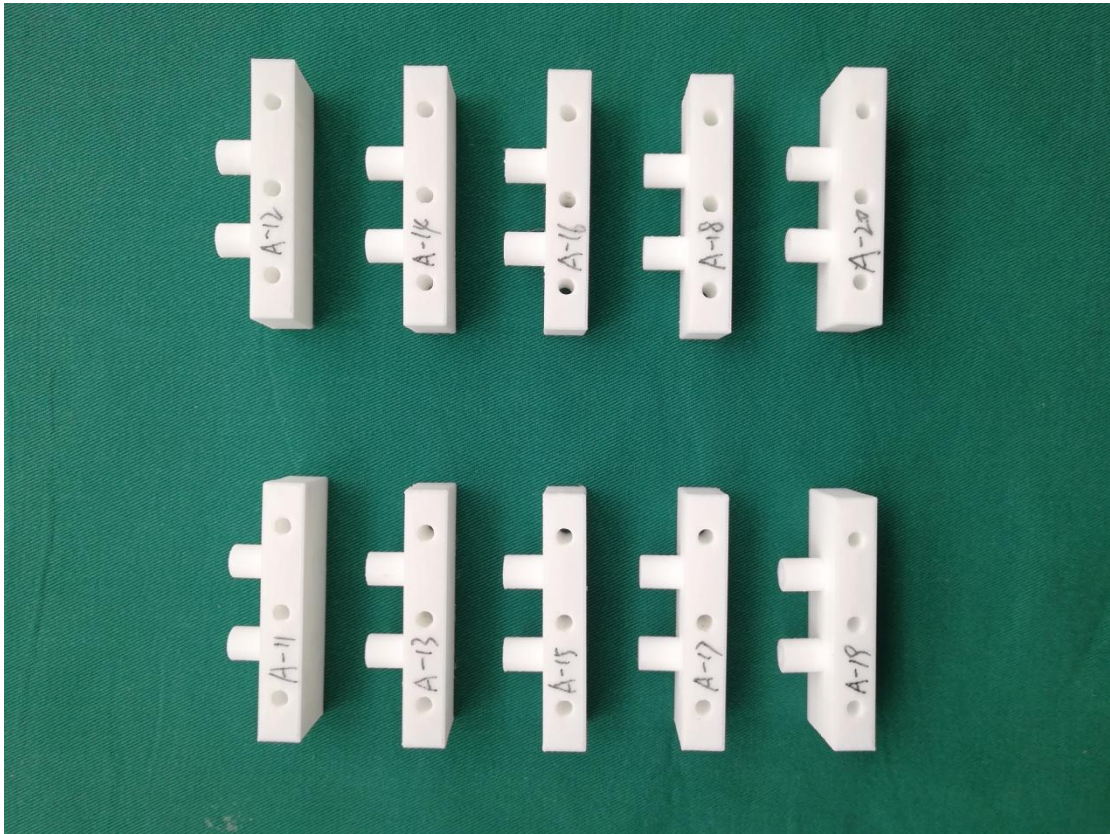

Figure S9. All modules of Group C.

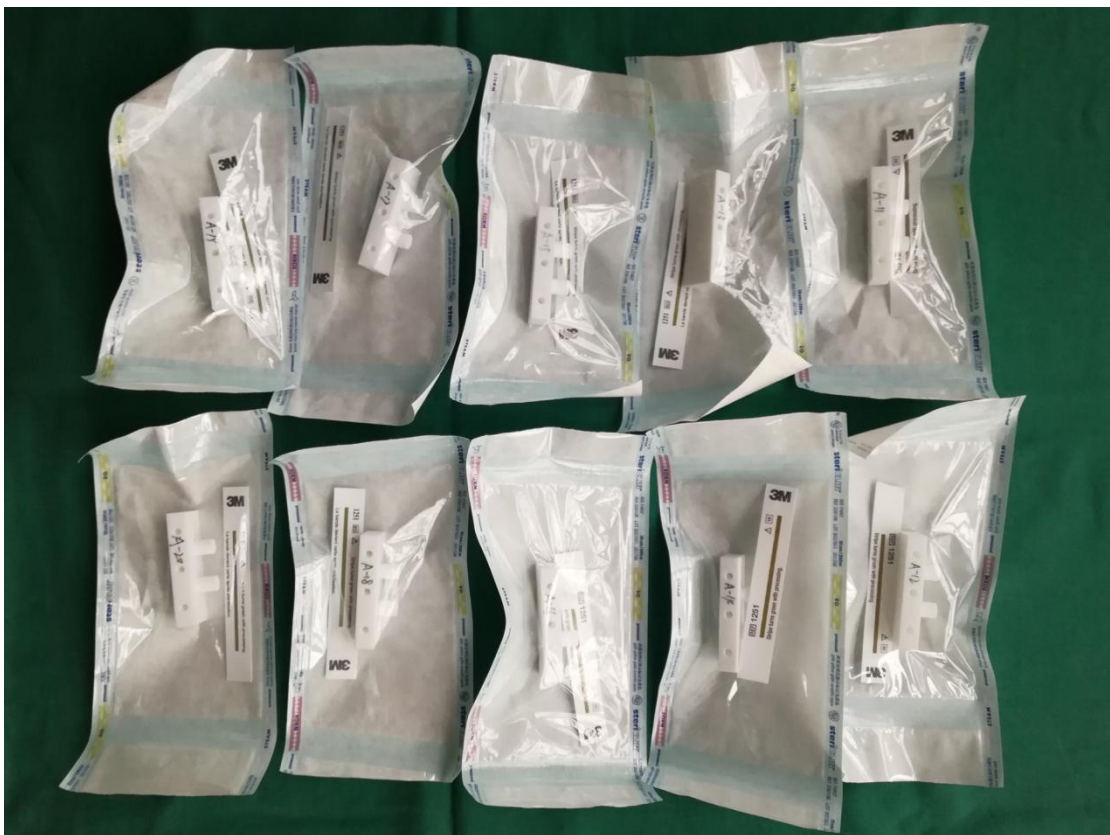

Figure S10. EO sterilization.

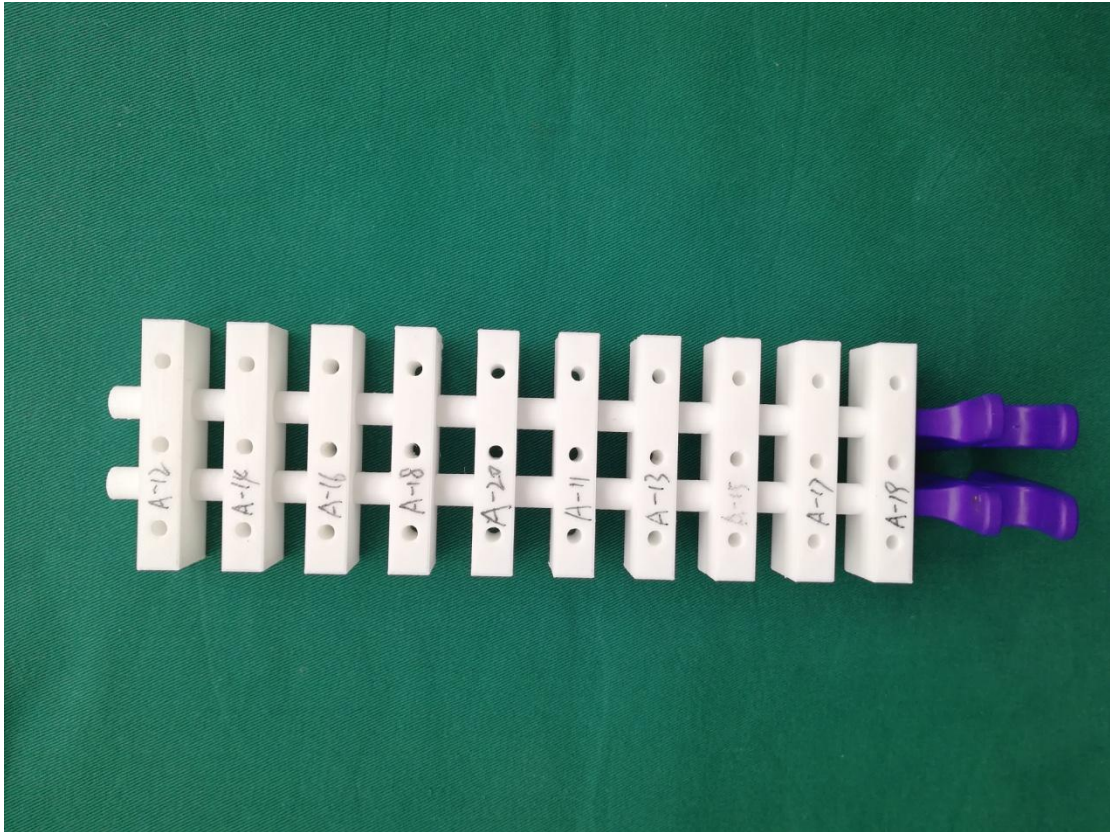

Figure S11. Positioning hole measurement.

**Group D:**

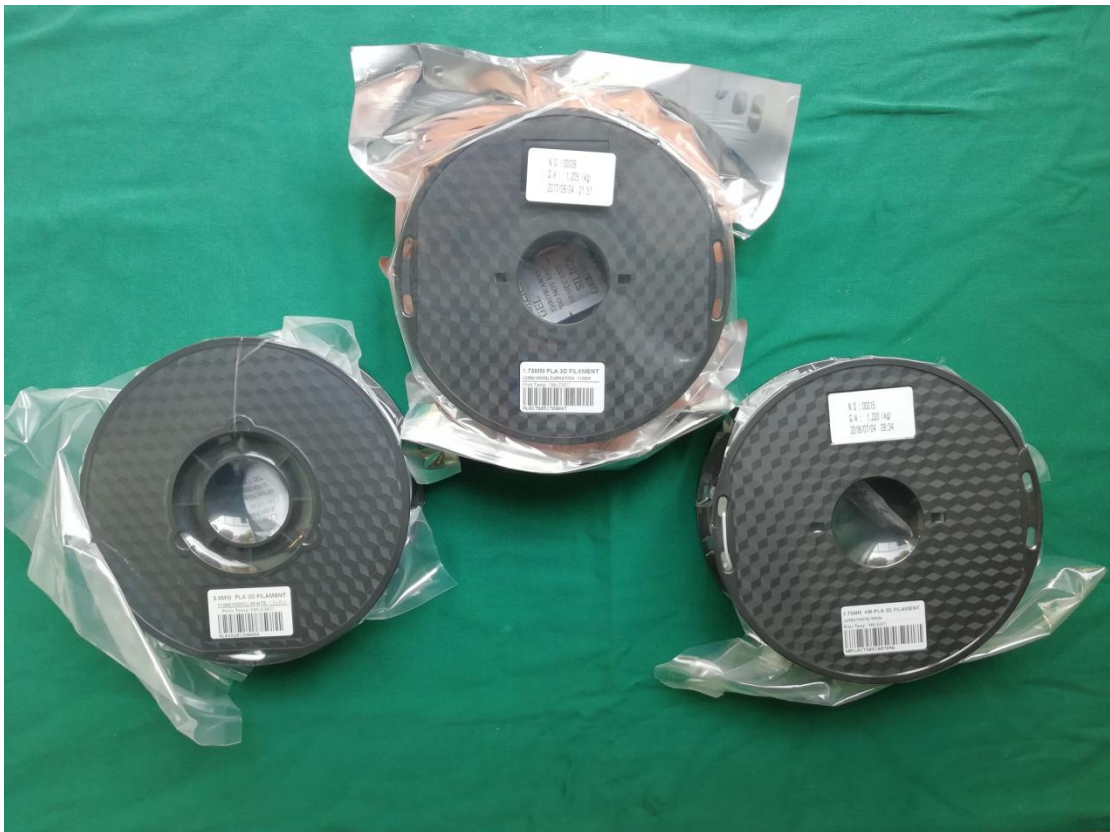

Figure S12. Consumables selection: adopt HR-PLA.

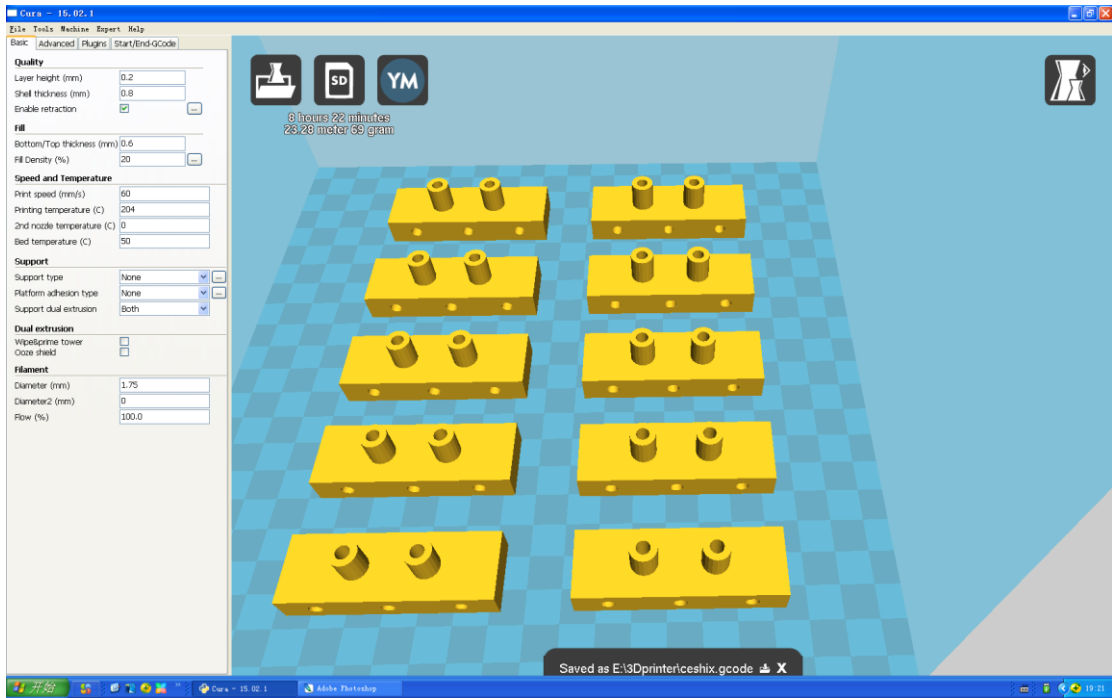

Figure S13. Slice using CURA software.

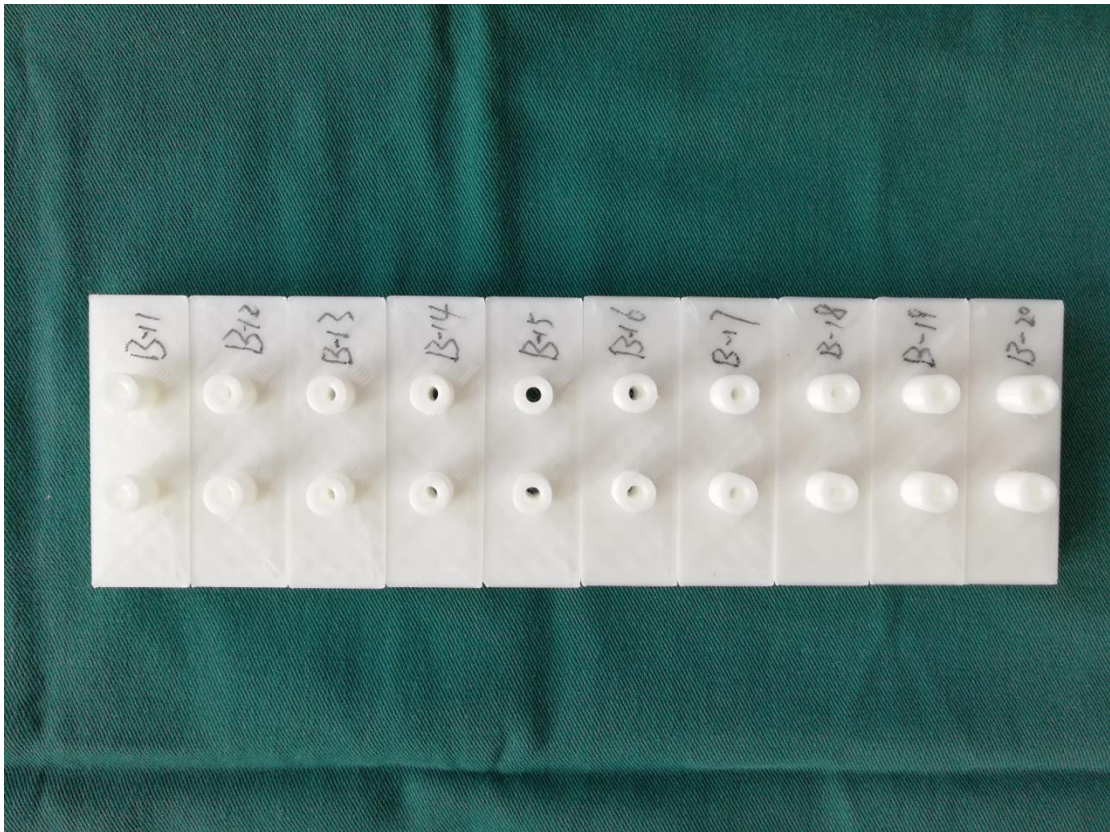

Figure S14. All modules of Group D.

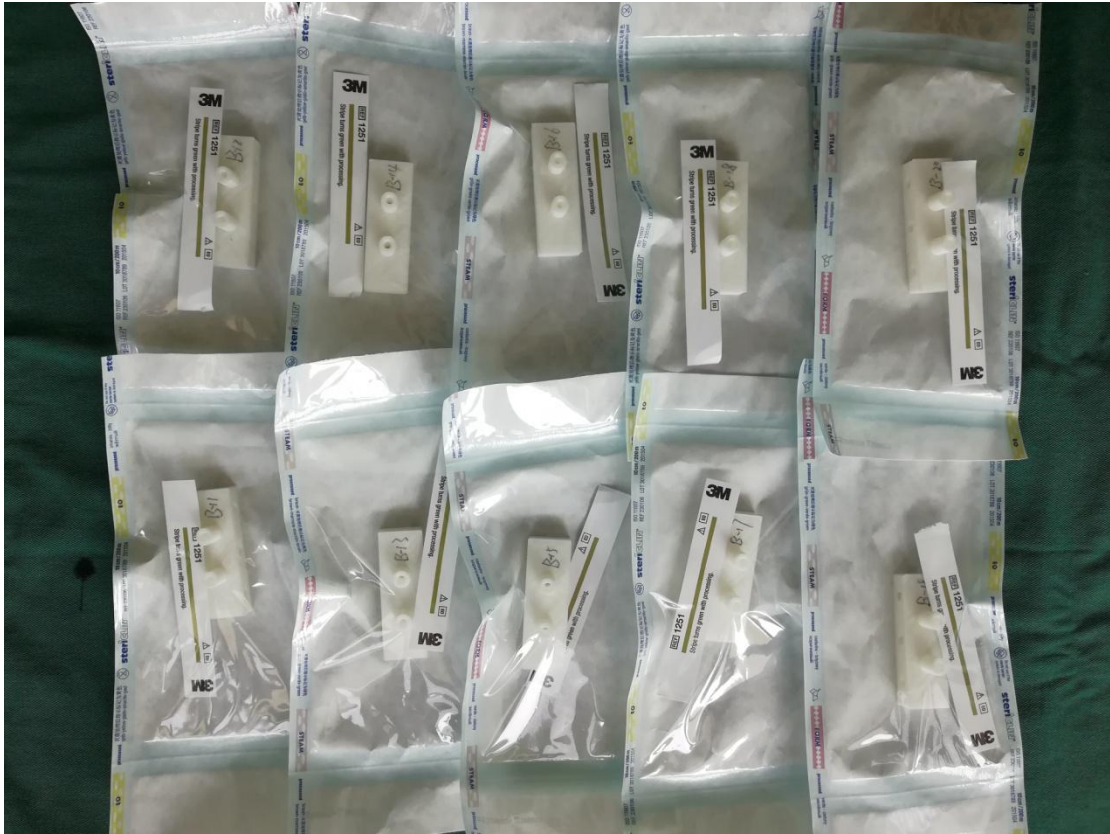

Figure S15. EO sterilization

## Group E:

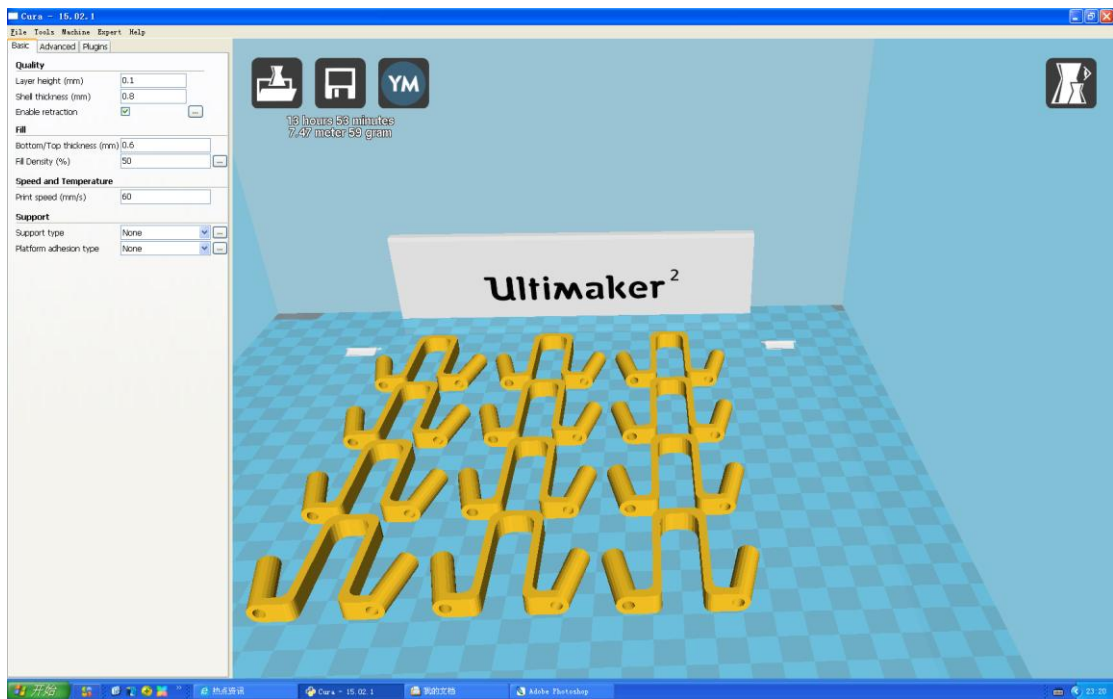

Figure S16. Slice using CURA software.



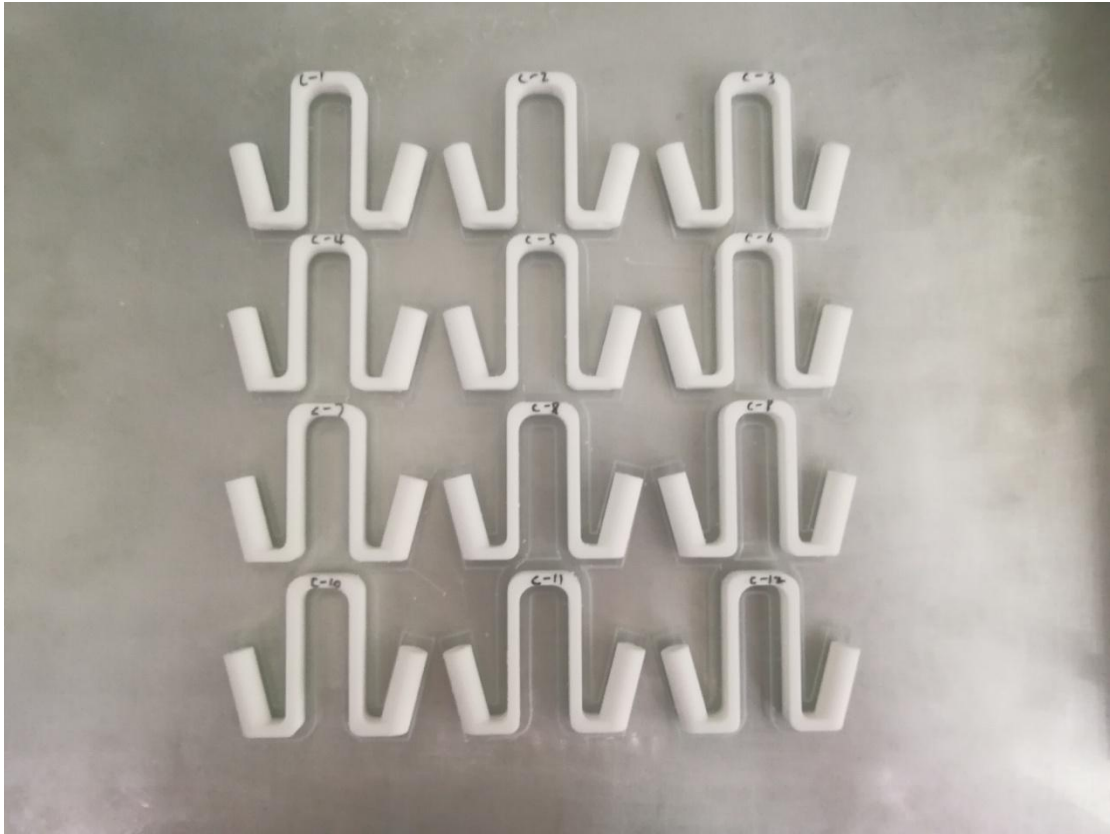

Figure S17. 3D printing was complete.

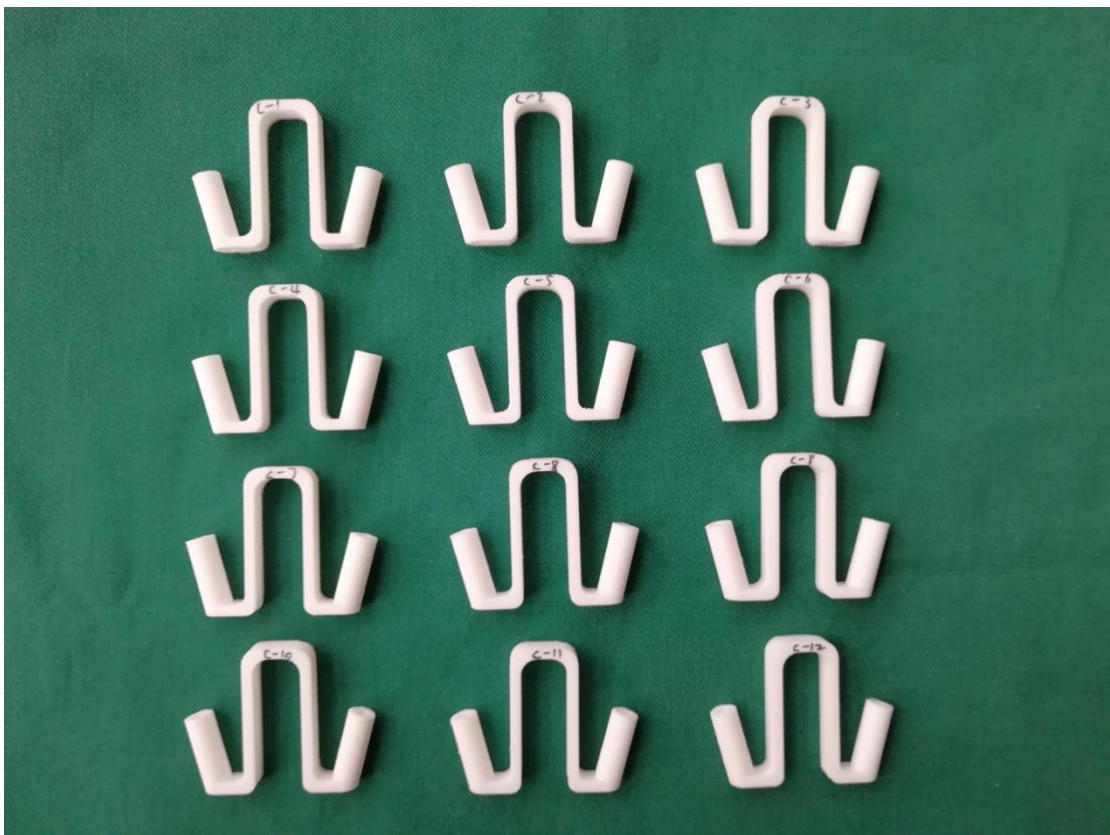

Figure S18. All modules of Group E.

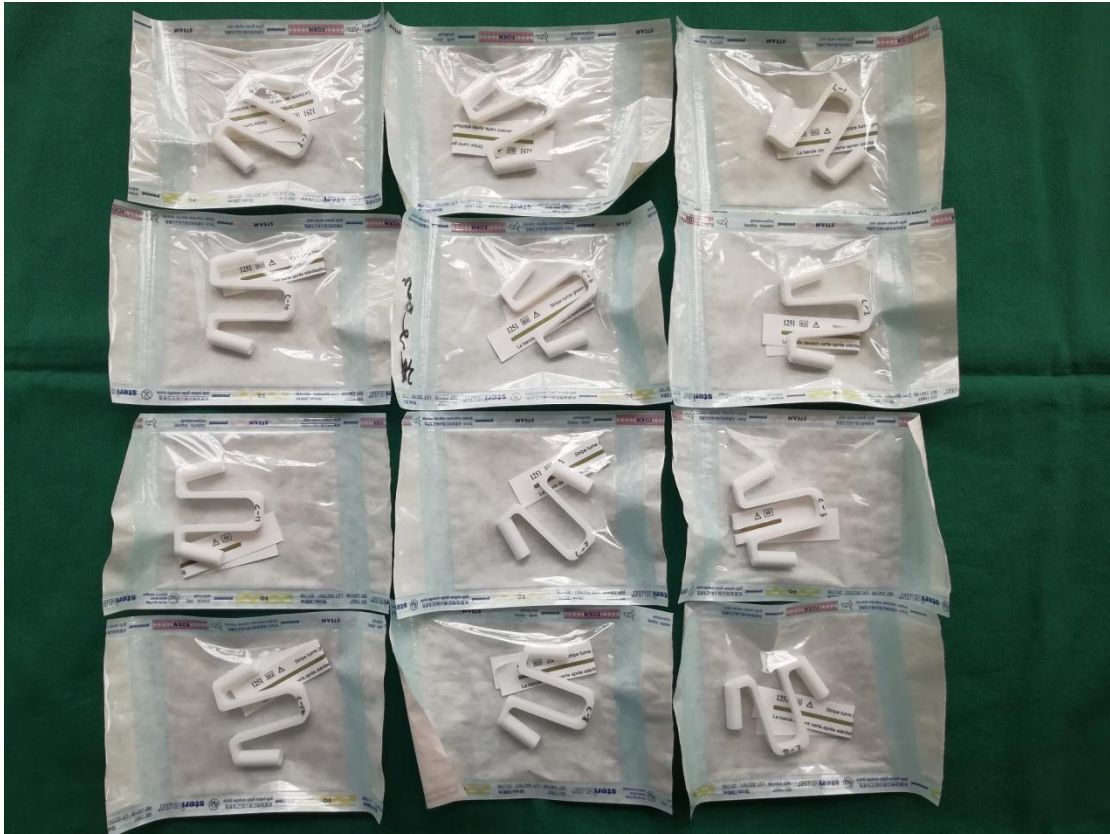

Figure S19. EO sterilization.

### Experiment 3

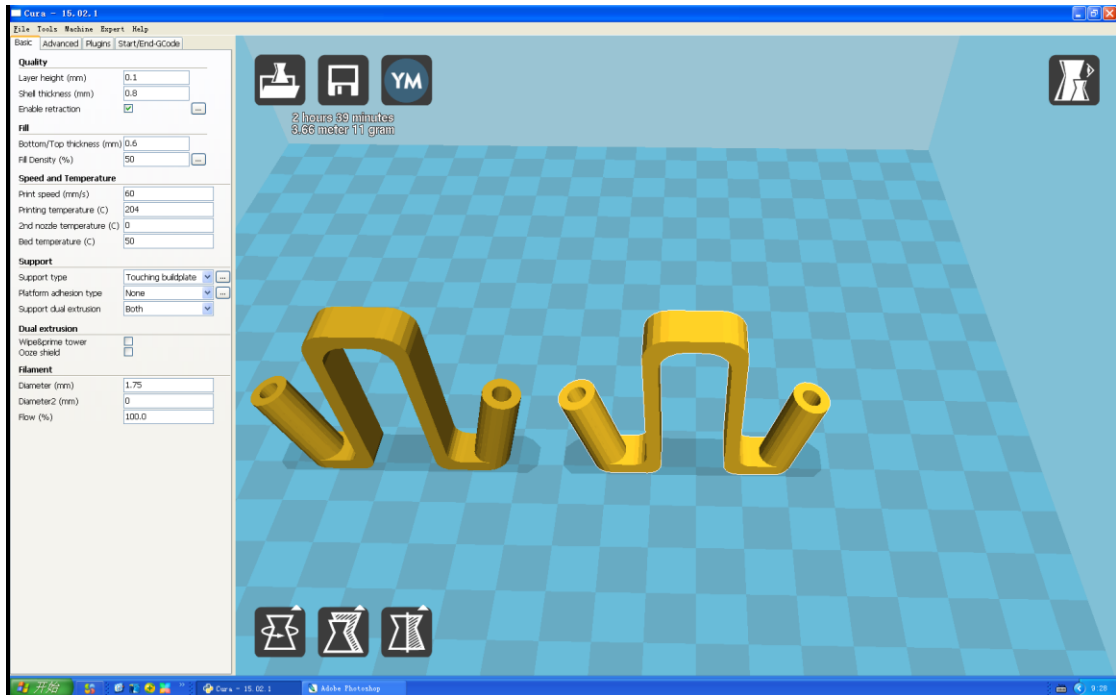

Figure S20. Slice using CURA software.

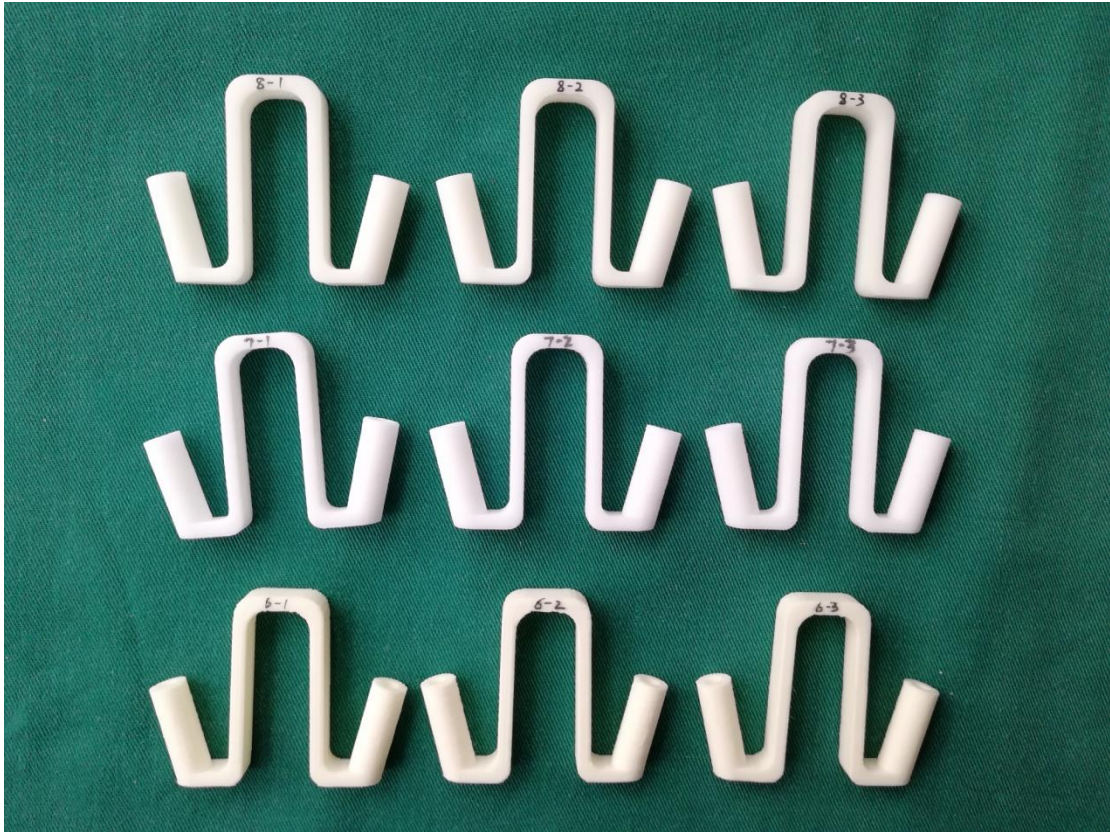

Figure S21. Before sterilization.

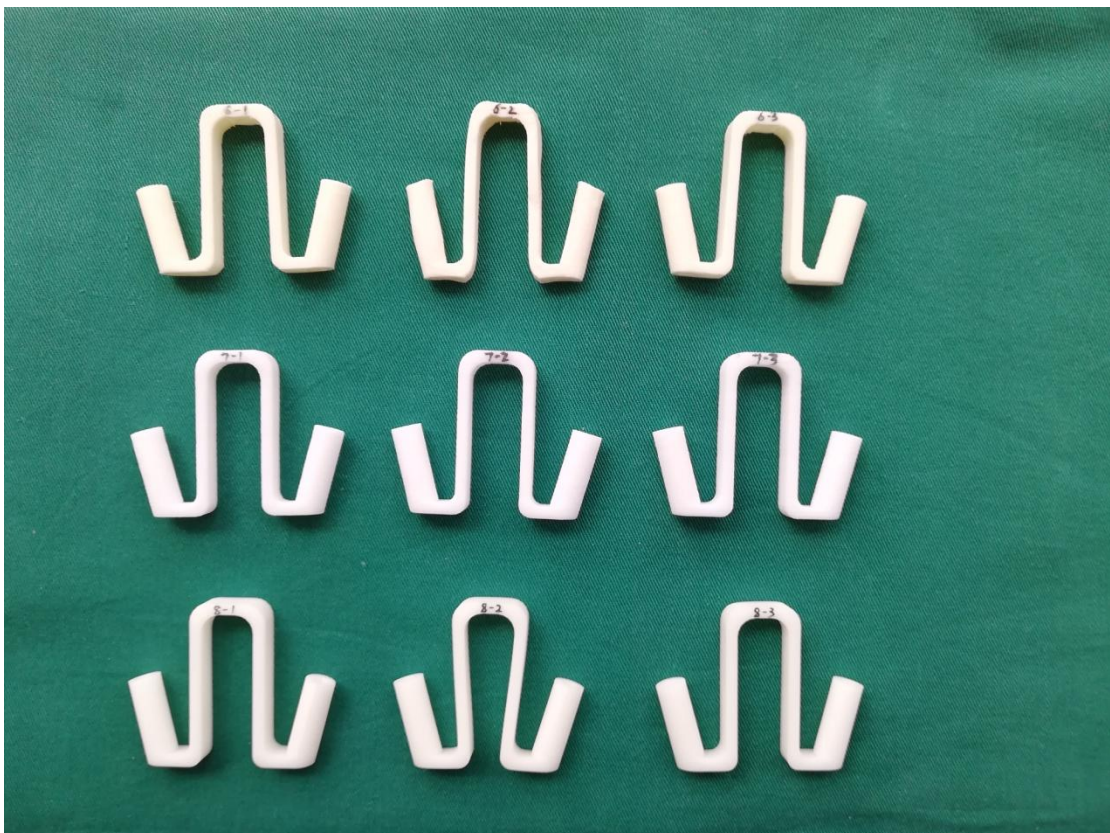

Figure S22. No deformation after EO sterilization(6-1,7-1,8-1) and plasma sterilization(6-3,7-3,8-3); Severe deformation after autoclaving(6-2, 8-2).

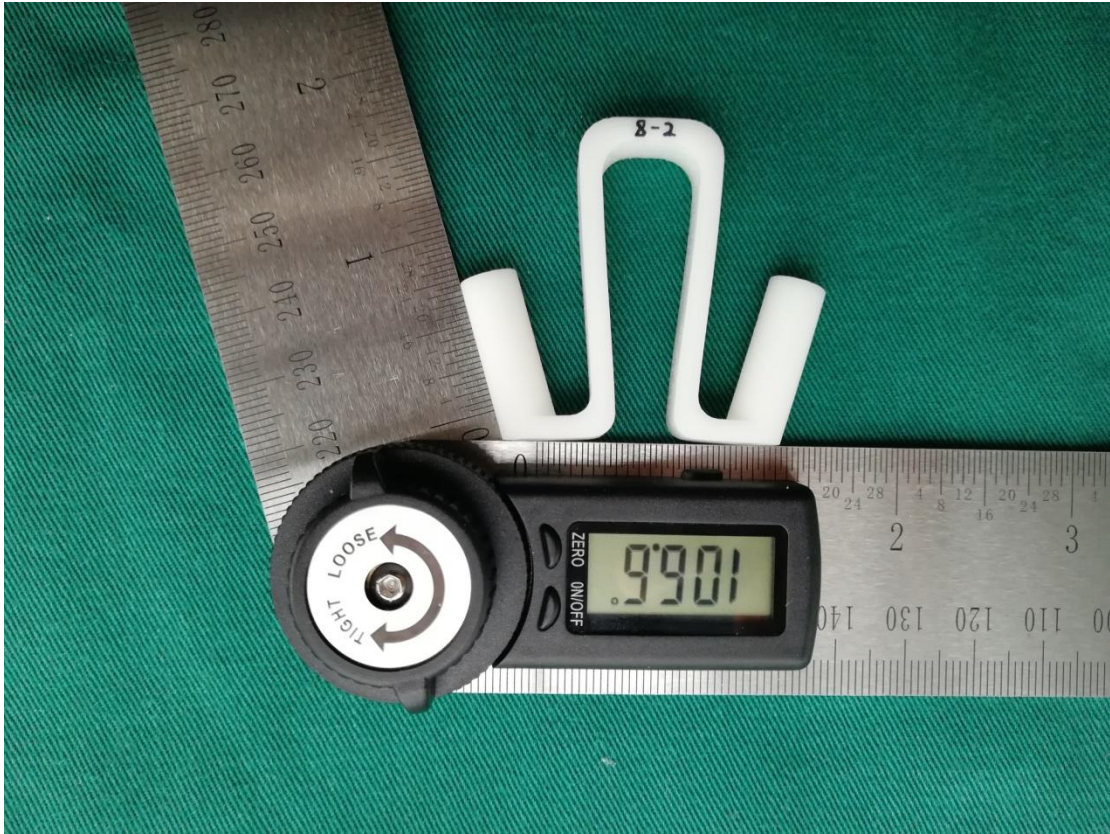

Figure S23. Obvious change in angle of guide hole.

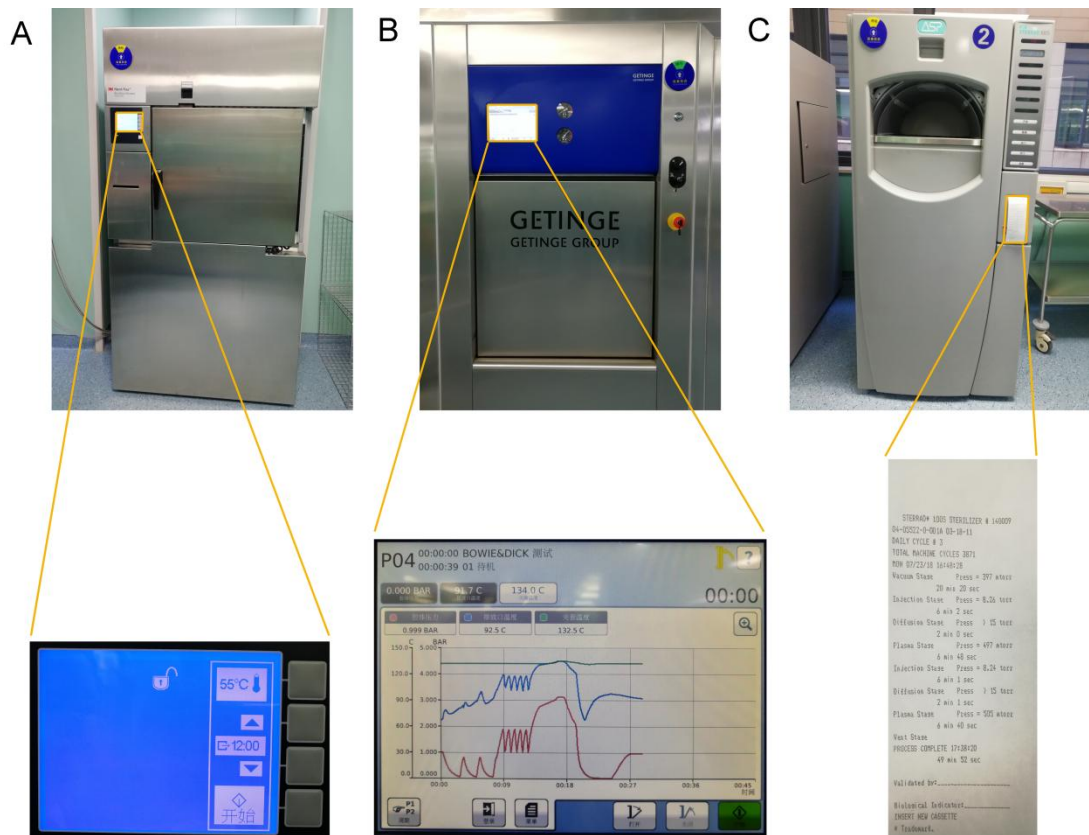

Figure S24. Methods and parameters of sterilization: (A) EO sterilization equipment; (B)

high-pressure steam sterilization equipment; (C) plasma sterilization equipment.

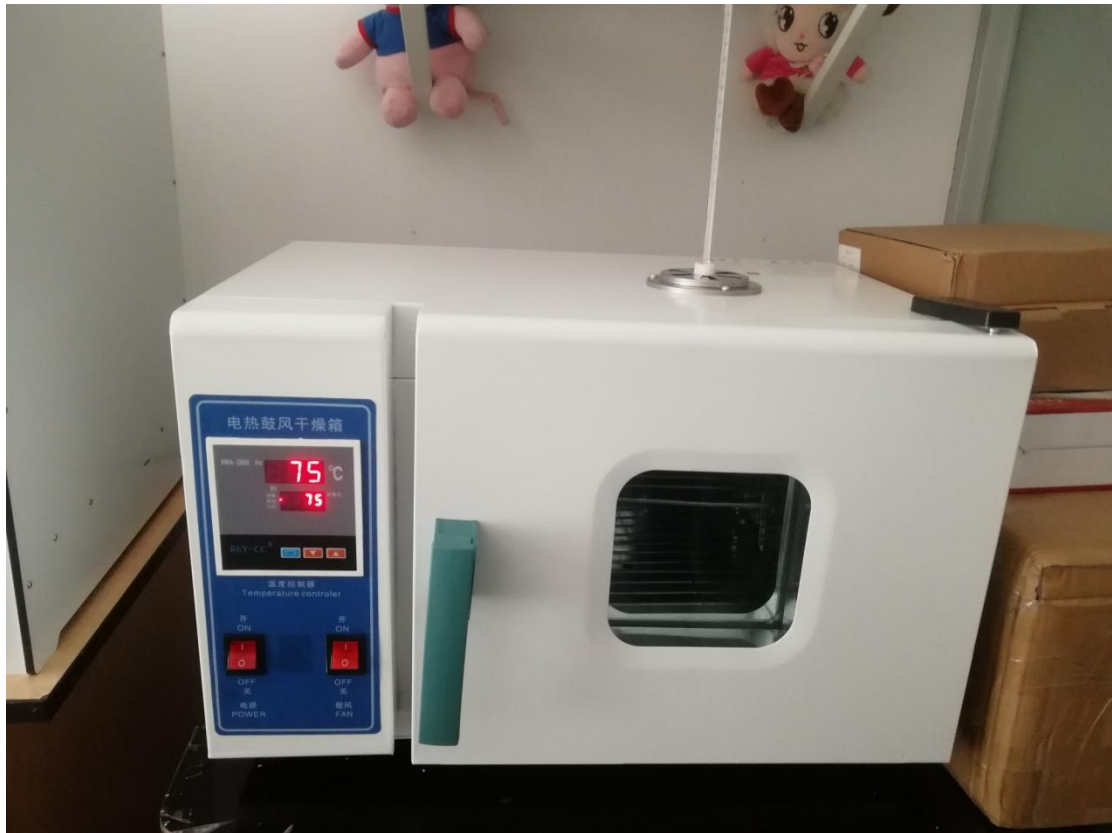

Figure S25. A constant temperature drying oven.

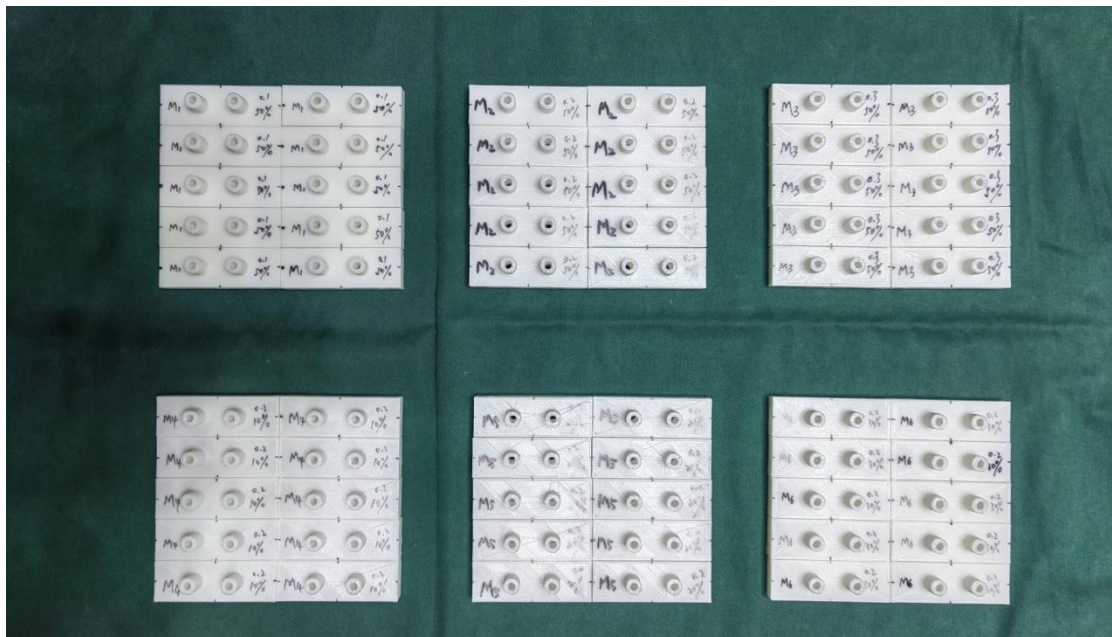

Figure S26. M1~M6 of M series.

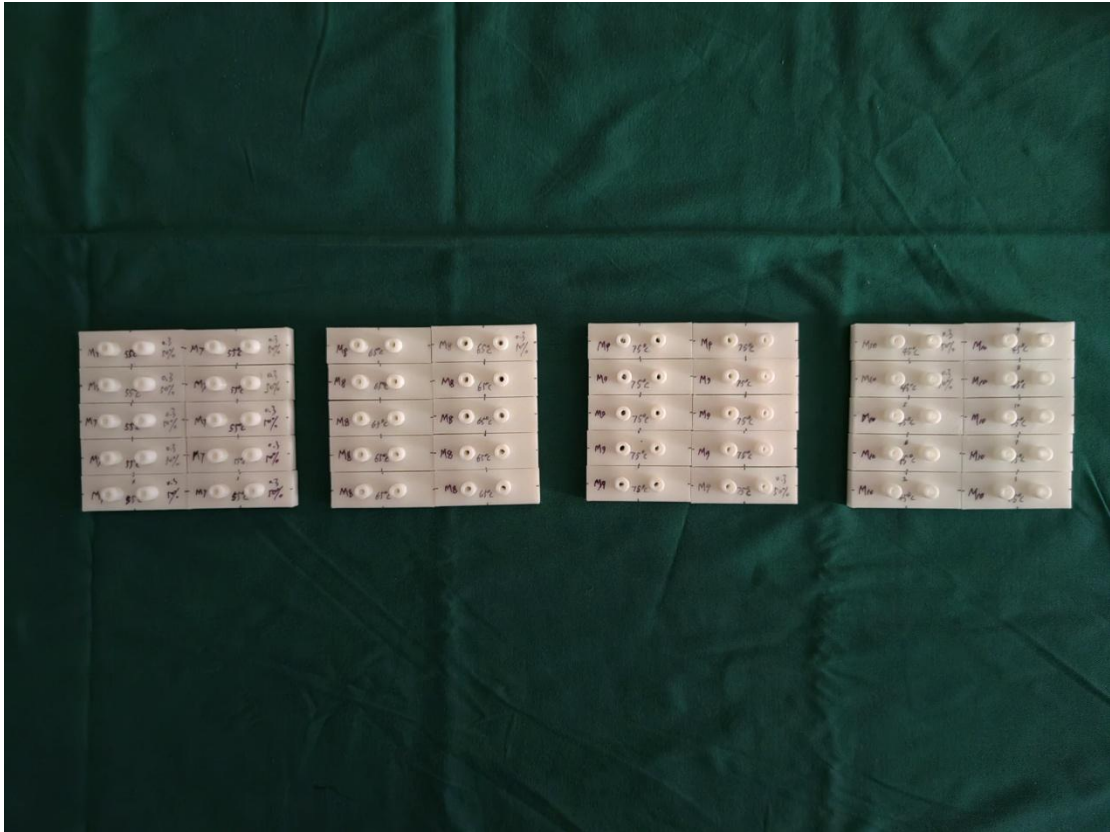

Figure S27. M7~M10 of M series.

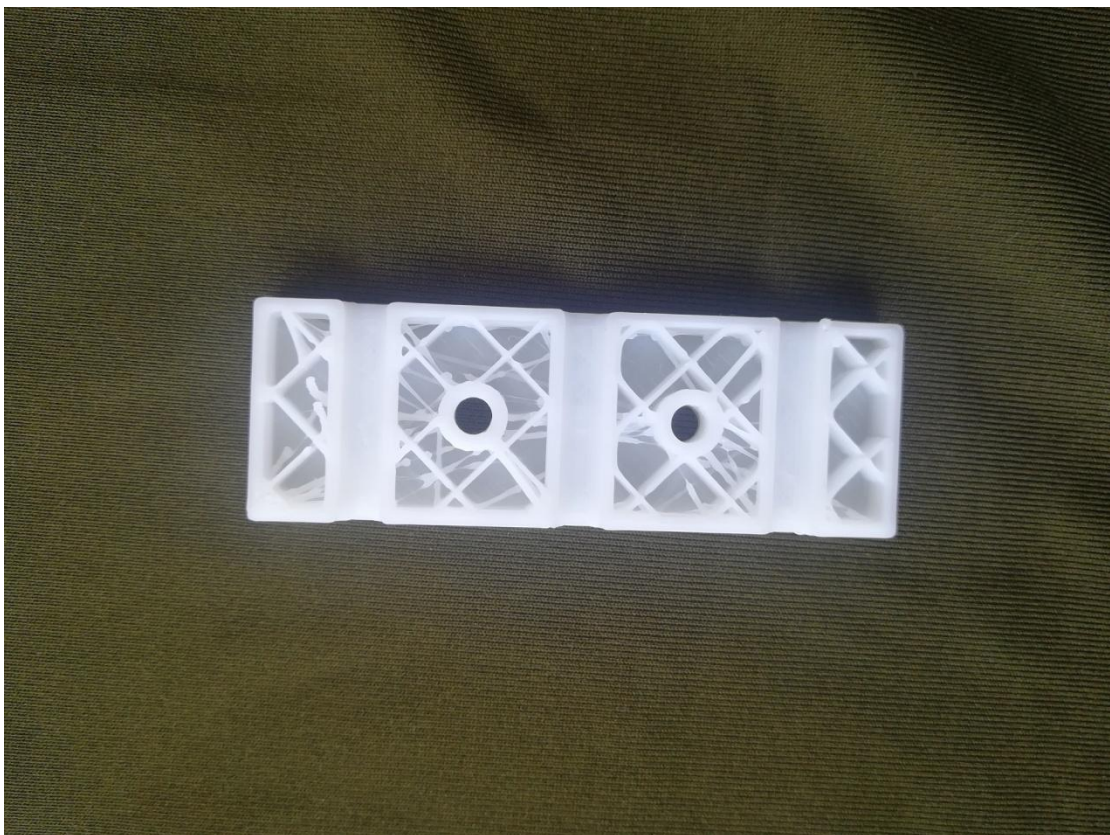

Figure S28. Infill pattern of the module

## Original data 1

|                                                                   |      | Before sterilization |       |       | After sterilization |       |       |
|-------------------------------------------------------------------|------|----------------------|-------|-------|---------------------|-------|-------|
|                                                                   |      | L1                   | L2    | L3    | L1                  | L2    | L3    |
| Module<br>size before<br>and after<br>EO<br>sterilization<br>(mm) | A-1  | 59.92                | 20.00 | 9.98  | 58.90               | 19.60 | 10.20 |
|                                                                   | A-2  | 60.00                | 20.00 | 10.00 | 59.14               | 19.72 | 10.16 |
|                                                                   | A-3  | 59.90                | 19.96 | 10.00 | 59.00               | 19.58 | 10.16 |
|                                                                   | A-4  | 60.00                | 20.00 | 10.00 | 59.12               | 19.56 | 10.16 |
|                                                                   | A-5  | 60.00                | 19.98 | 9.98  | 58.80               | 19.62 | 10.16 |
|                                                                   | A-6  | 60.02                | 19.98 | 10.00 | 59.22               | 19.68 | 10.20 |
|                                                                   | A-7  | 59.94                | 19.90 | 10.02 | 59.00               | 19.50 | 10.30 |
|                                                                   | A-8  | 60.00                | 19.92 | 10.00 | 58.84               | 19.58 | 10.18 |
|                                                                   | A-9  | 59.96                | 19.94 | 10.00 | 58.78               | 19.60 | 10.24 |
|                                                                   | A-10 | 60.00                | 19.94 | 10.00 | 59.10               | 19.46 | 10.20 |
|                                                                   | B-1  | 60.22                | 20.12 | 9.92  | 59.10               | 19.74 | 10.06 |
|                                                                   | B-2  | 60.10                | 20.10 | 9.92  | 58.94               | 19.76 | 10.06 |
|                                                                   | B-3  | 60.20                | 20.20 | 9.96  | 59.22               | 19.70 | 10.18 |
|                                                                   | B-4  | 60.10                | 20.14 | 10.00 | 58.94               | 19.78 | 10.20 |
|                                                                   | B-5  | 60.18                | 20.14 | 10.00 | 59.02               | 19.76 | 10.18 |
|                                                                   | B-6  | 60.00                | 20.10 | 10.00 | 59.10               | 19.70 | 10.28 |
|                                                                   | B-7  | 60.10                | 20.16 | 9.96  | 59.00               | 19.80 | 10.12 |
|                                                                   | B-8  | 60.10                | 20.16 | 10.00 | 58.96               | 19.78 | 10.22 |
|                                                                   | B-9  | 60.10                | 20.16 | 9.92  | 59.00               | 19.82 | 10.08 |
|                                                                   | B-10 | 60.10                | 20.10 | 9.98  | 59.06               | 19.70 | 10.18 |
|                                                                   | A-11 | 60.00                | 20.22 | 10.00 | 59.14               | 20.44 | 9.88  |
|                                                                   | A-12 | 60.00                | 20.18 | 10.00 | 59.14               | 20.44 | 9.92  |
|                                                                   | A-13 | 60.02                | 20.20 | 10.00 | 59.14               | 20.42 | 9.92  |
|                                                                   | A-14 | 59.96                | 20.18 | 10.00 | 59.00               | 20.40 | 9.96  |
|                                                                   | A-15 | 60.00                | 20.20 | 10.04 | 59.00               | 20.40 | 10.00 |
|                                                                   | A-16 | 60.00                | 20.16 | 10.00 | 59.08               | 20.48 | 9.98  |
|                                                                   | A-17 | 59.90                | 20.18 | 10.02 | 58.98               | 20.40 | 9.96  |
|                                                                   | A-18 | 60.00                | 20.20 | 9.98  | 59.04               | 20.46 | 9.88  |
|                                                                   | A-19 | 60.00                | 20.20 | 10.00 | 58.98               | 20.40 | 9.88  |
|                                                                   | A-20 | 60.00                | 20.22 | 10.10 | 59.00               | 20.48 | 10.00 |
|                                                                   | B-11 | 59.88                | 19.98 | 10.00 | 59.80               | 20.00 | 10.00 |
|                                                                   | B-12 | 59.80                | 20.00 | 10.00 | 59.78               | 20.00 | 9.98  |
|                                                                   | B-13 | 59.84                | 20.00 | 10.02 | 59.68               | 20.00 | 10.00 |
|                                                                   | B-14 | 59.78                | 20.02 | 10.00 | 59.60               | 20.02 | 10.00 |
|                                                                   | B-15 | 59.90                | 20.00 | 10.02 | 59.76               | 20.00 | 10.00 |
|                                                                   | B-16 | 59.84                | 20.00 | 9.98  | 59.68               | 20.00 | 9.98  |
|                                                                   | B-17 | 59.80                | 20.00 | 10.00 | 59.64               | 20.02 | 10.00 |
|                                                                   | B-18 | 59.76                | 20.02 | 10.00 | 59.60               | 20.02 | 10.02 |
|                                                                   | B-19 | 59.84                | 20.00 | 10.00 | 59.68               | 19.98 | 10.00 |
|                                                                   | B-20 | 59.82                | 20.00 | 10.04 | 59.66               | 20.00 | 10.00 |
| PLA+                                                              | A-21 | 60.14                | 20.22 | 10.04 | 58.44               | 19.62 | 10.30 |

|      |       |       |       |       |       |       |
|------|-------|-------|-------|-------|-------|-------|
| A-22 | 60.10 | 20.18 | 10.00 | 58.34 | 19.64 | 10.28 |
| A-23 | 60.10 | 20.22 | 9.96  | 58.38 | 19.66 | 10.26 |
| A-24 | 60.02 | 20.16 | 10.08 | 58.54 | 19.68 | 10.44 |
| A-25 | 60.06 | 20.22 | 10.10 | 58.30 | 19.68 | 10.48 |
| A-26 | 60.10 | 20.16 | 10.00 | 58.42 | 19.72 | 10.34 |
| A-27 | 60.14 | 20.18 | 10.06 | 58.48 | 19.68 | 10.30 |
| A-28 | 60.12 | 20.20 | 10.04 | 58.46 | 19.68 | 10.28 |
| A-29 | 60.00 | 20.22 | 9.98  | 58.44 | 19.72 | 10.30 |
| A-30 | 60.02 | 20.20 | 10.04 | 58.32 | 19.66 | 10.30 |

**Original data 2 (M series)**



|    | L1 (pre-E0) |       |       |       |       |       | L1 (post-E0) |       |       |       |       |       | L1 (pre-) |       |       |       | 2h    |       |       |       | 4h    |       |       |       | 6h    |       |       |       |
|----|-------------|-------|-------|-------|-------|-------|--------------|-------|-------|-------|-------|-------|-----------|-------|-------|-------|-------|-------|-------|-------|-------|-------|-------|-------|-------|-------|-------|-------|
|    | M1          | M2    | M3    | M4    | M5    | M6    | M1           | M2    | M3    | M4    | M5    | M6    | M7        | M8    | M9    | M10   | M7    | M8    | M9    | M10   | M7    | M8    | M9    | M10   | M7    | M8    | M9    | M10   |
| 1  | 59.78       | 59.94 | 60.20 | 59.90 | 59.86 | 59.86 | 57.54        | 58.48 | 58.82 | 58.20 | 57.96 | 58.26 | 60.12     | 60.12 | 60.04 | 60.20 | 59.56 | 59.14 | 58.56 | 60.20 | 59.46 | 58.84 | 58.58 | 60.20 | 59.44 | 59.06 | 58.56 | 60.20 |
| 2  | 59.80       | 59.90 | 60.08 | 59.90 | 59.84 | 59.84 | 57.80        | 58.12 | 58.74 | 58.36 | 58.08 | 58.16 | 60.18     | 60.24 | 60.16 | 60.06 | 59.66 | 59.14 | 58.42 | 60.10 | 59.42 | 59.04 | 58.54 | 60.10 | 59.32 | 59.02 | 58.50 | 60.06 |
| 3  | 59.92       | 59.98 | 60.20 | 59.80 | 59.78 | 59.92 | 57.52        | 58.26 | 58.62 | 58.08 | 58.06 | 58.20 | 60.22     | 60.00 | 60.04 | 60.14 | 59.32 | 59.08 | 58.62 | 60.16 | 59.52 | 58.92 | 58.52 | 60.14 | 59.42 | 58.90 | 58.44 | 60.18 |
| 4  | 59.80       | 59.88 | 60.08 | 60.00 | 59.94 | 59.84 | 57.96        | 58.18 | 58.76 | 58.08 | 58.02 | 58.04 | 60.08     | 60.08 | 60.00 | 60.20 | 59.38 | 59.08 | 58.60 | 60.20 | 59.48 | 58.92 | 58.54 | 60.16 | 59.48 | 58.98 | 58.62 | 60.20 |
| 5  | 59.90       | 59.90 | 60.06 | 59.90 | 59.78 | 59.94 | 57.78        | 58.02 | 58.62 | 58.12 | 58.26 | 58.24 | 60.10     | 60.06 | 60.14 | 60.00 | 59.64 | 59.06 | 58.64 | 60.08 | 59.60 | 58.90 | 58.44 | 60.02 | 59.32 | 58.98 | 58.44 | 60.06 |
| 6  | 59.80       | 59.90 | 60.04 | 59.78 | 59.90 | 59.94 | 57.70        | 58.24 | 58.80 | 58.24 | 58.06 | 58.30 | 60.00     | 60.20 | 60.10 | 60.04 | 59.44 | 58.98 | 58.52 | 60.06 | 59.32 | 59.02 | 58.44 | 60.08 | 59.56 | 59.00 | 58.62 | 60.04 |
| 7  | 59.76       | 59.90 | 60.14 | 59.82 | 59.80 | 59.80 | 57.80        | 58.30 | 58.86 | 58.20 | 58.00 | 58.24 | 60.02     | 60.06 | 59.98 | 60.04 | 59.68 | 59.10 | 58.50 | 60.06 | 59.52 | 58.98 | 58.54 | 60.04 | 59.50 | 59.06 | 58.54 | 60.06 |
| 8  | 59.82       | 59.82 | 60.18 | 59.86 | 59.90 | 59.90 | 57.90        | 58.34 | 58.54 | 58.28 | 58.10 | 58.06 | 60.06     | 60.02 | 60.08 | 60.06 | 59.50 | 58.90 | 58.58 | 60.04 | 59.54 | 59.02 | 58.46 | 60.00 | 59.60 | 58.86 | 58.54 | 60.04 |
| 9  | 59.80       | 59.94 | 60.02 | 59.80 | 59.80 | 59.86 | 57.74        | 58.22 | 58.66 | 58.00 | 58.24 | 58.00 | 60.14     | 60.04 | 60.16 | 60.20 | 59.60 | 59.00 | 58.44 | 60.18 | 59.36 | 59.00 | 58.58 | 60.18 | 59.52 | 59.08 | 58.64 | 60.16 |
| 10 | 59.84       | 59.84 | 60.02 | 59.90 | 59.88 | 59.88 | 57.70        | 58.54 | 58.96 | 58.18 | 58.16 | 58.12 | 60.24     | 60.18 | 60.10 | 59.98 | 59.68 | 59.04 | 58.66 | 59.98 | 59.60 | 59.04 | 58.62 | 60.00 | 59.46 | 59.04 | 58.64 | 59.98 |

|    | L2 (pre-E0) |       |       |       |       |       | L2 (post-E0) |       |       |       |       |       | L2 (pre-) |       |       |       | 2h    |       |       |       | 4h    |       |       |       | 6h    |       |       |       |
|----|-------------|-------|-------|-------|-------|-------|--------------|-------|-------|-------|-------|-------|-----------|-------|-------|-------|-------|-------|-------|-------|-------|-------|-------|-------|-------|-------|-------|-------|
|    | M1          | M2    | M3    | M4    | M5    | M6    | M1           | M2    | M3    | M4    | M5    | M6    | M7        | M8    | M9    | M10   | M7    | M8    | M9    | M10   | M7    | M8    | M9    | M10   | M7    | M8    | M9    | M10   |
| 1  | 20.00       | 19.94 | 20.26 | 19.90 | 20.08 | 20.06 | 19.36        | 19.72 | 19.98 | 19.58 | 19.70 | 19.54 | 20.16     | 20.26 | 20.16 | 20.22 | 20.06 | 19.96 | 19.72 | 20.20 | 19.92 | 19.80 | 19.84 | 20.24 | 19.98 | 19.80 | 19.74 | 20.22 |
| 2  | 19.96       | 19.90 | 20.14 | 19.98 | 20.00 | 20.00 | 19.48        | 19.74 | 20.04 | 19.40 | 19.76 | 19.54 | 20.26     | 20.04 | 20.24 | 20.16 | 19.94 | 19.98 | 19.74 | 20.16 | 19.94 | 19.94 | 19.68 | 20.14 | 20.02 | 19.94 | 19.84 | 20.16 |
| 3  | 19.82       | 20.04 | 20.30 | 19.96 | 19.96 | 19.90 | 19.48        | 19.74 | 19.98 | 19.66 | 19.76 | 19.58 | 20.22     | 20.20 | 20.14 | 20.30 | 20.06 | 19.76 | 19.78 | 20.28 | 20.10 | 19.90 | 19.78 | 20.28 | 19.98 | 19.92 | 19.76 | 20.28 |
| 4  | 19.94       | 19.92 | 20.12 | 19.94 | 19.88 | 19.98 | 19.34        | 19.64 | 19.88 | 19.58 | 19.64 | 19.70 | 20.20     | 20.28 | 20.26 | 20.06 | 20.06 | 20.00 | 19.82 | 20.08 | 20.04 | 19.90 | 19.74 | 20.08 | 20.04 | 19.94 | 19.84 | 20.08 |
| 5  | 19.96       | 20.04 | 20.22 | 20.08 | 20.00 | 20.00 | 19.52        | 19.86 | 19.90 | 19.68 | 19.56 | 19.52 | 20.28     | 20.18 | 20.22 | 20.14 | 20.06 | 20.04 | 19.80 | 20.18 | 20.06 | 19.88 | 19.80 | 20.14 | 20.04 | 20.00 | 19.80 | 20.16 |
| 6  | 19.88       | 20.04 | 20.22 | 20.00 | 19.96 | 19.94 | 19.38        | 19.60 | 20.02 | 19.58 | 19.48 | 19.66 | 20.26     | 20.24 | 20.20 | 20.22 | 19.98 | 19.92 | 19.82 | 20.24 | 20.06 | 20.00 | 19.80 | 20.26 | 20.02 | 19.88 | 19.80 | 20.24 |
| 7  | 19.98       | 20.00 | 20.20 | 19.96 | 19.84 | 19.98 | 19.48        | 19.72 | 19.92 | 19.58 | 19.72 | 19.70 | 20.16     | 20.18 | 20.22 | 20.20 | 20.10 | 19.98 | 19.84 | 20.22 | 20.14 | 20.00 | 19.82 | 20.24 | 20.04 | 19.98 | 19.72 | 20.24 |
| 8  | 19.90       | 19.98 | 20.12 | 20.02 | 20.04 | 19.90 | 19.30        | 19.62 | 19.88 | 19.62 | 19.72 | 19.62 | 20.24     | 20.12 | 20.28 | 20.22 | 20.00 | 19.86 | 19.72 | 20.24 | 20.06 | 19.90 | 19.82 | 20.24 | 19.92 | 19.88 | 19.82 | 20.24 |
| 9  | 20.00       | 19.90 | 20.26 | 20.00 | 19.84 | 19.88 | 19.50        | 19.64 | 19.82 | 19.68 | 19.48 | 19.66 | 20.28     | 20.20 | 20.08 | 20.24 | 20.06 | 19.94 | 19.80 | 20.30 | 20.02 | 19.92 | 19.74 | 20.28 | 20.10 | 20.00 | 19.68 | 20.30 |
| 10 | 19.92       | 20.02 | 20.10 | 19.92 | 19.92 | 20.06 | 19.48        | 19.64 | 19.92 | 19.54 | 19.48 | 19.66 | 20.08     | 20.26 | 20.22 | 20.24 | 20.14 | 19.92 | 19.68 | 20.26 | 19.92 | 19.92 | 19.68 | 20.28 | 20.10 | 19.94 | 19.78 | 20.26 |

|   | L3 (pre-E0) |      |      |      |      |      | L3 (post-E0) |       |      |       |       |       | L3 (pre-) |      |      |      | 2h   |      |       |      | 4h   |      |       |      | 6h   |      |       |      |
|---|-------------|------|------|------|------|------|--------------|-------|------|-------|-------|-------|-----------|------|------|------|------|------|-------|------|------|------|-------|------|------|------|-------|------|
|   | M1          | M2   | M3   | M4   | M5   | M6   | M1           | M2    | M3   | M4    | M5    | M6    | M7        | M8   | M9   | M10  | M7   | M8   | M9    | M10  | M7   | M8   | M9    | M10  | M7   | M8   | M9    | M10  |
| 1 | 9.76        | 9.90 | 9.62 | 9.76 | 9.80 | 9.86 | 10.08        | 10.08 | 9.76 | 10.04 | 10.06 | 10.06 | 9.60      | 9.66 | 9.58 | 9.64 | 9.70 | 9.92 | 9.94  | 9.66 | 9.68 | 9.84 | 9.86  | 9.66 | 9.68 | 9.94 | 9.94  | 9.66 |
| 2 | 9.66        | 9.94 | 9.60 | 9.80 | 9.84 | 9.90 | 10.12        | 10.04 | 9.88 | 10.06 | 10.06 | 10.16 | 9.60      | 9.72 | 9.66 | 9.62 | 9.76 | 9.84 | 10.06 | 9.60 | 9.66 | 9.84 | 10.02 | 9.60 | 9.72 | 9.94 | 10.00 | 9.60 |
| 3 | 9.74        | 9.82 | 9.56 | 9.76 | 9.80 | 9.96 | 10.10        | 10.10 | 9.80 | 10.04 | 10.04 | 10.16 | 9.64      | 9.64 | 9.66 | 9.66 | 9.74 | 9.88 | 9.94  | 9.62 | 9.66 | 9.84 | 9.96  | 9.64 | 9.68 | 9.86 | 10.06 | 9.64 |
| 4 | 9.70        | 9.84 | 9.56 | 9.80 | 9.90 | 9.90 | 9.96         | 10.20 | 9.80 | 10.02 | 10.10 | 10.06 | 9.60      | 9.60 | 9.72 | 9.68 | 9.68 | 9.90 | 9.96  | 9.70 | 9.66 | 9.84 | 9.92  | 9.66 | 9.70 | 9.90 | 10.02 | 9.74 |
| 5 | 9.80        | 9.84 | 9.66 | 9.80 | 9.80 | 9.92 | 9.98         | 10.00 | 9.88 | 10.04 | 10.12 | 10.16 | 9.60      | 9.60 | 9.66 | 9.68 | 9.70 | 9.78 | 9.90  | 9.74 | 9.68 | 9.84 | 9.94  | 9.74 | 9.70 | 9.82 | 10.06 | 9.70 |

|    |      |      |      |      |      |      |       |       |      |       |       |       |      |      |      |      |      |      |       |      |      |      |       |      |      |      |       |      |
|----|------|------|------|------|------|------|-------|-------|------|-------|-------|-------|------|------|------|------|------|------|-------|------|------|------|-------|------|------|------|-------|------|
| 6  | 9.66 | 9.90 | 9.56 | 9.76 | 9.90 | 9.94 | 10.08 | 10.10 | 9.80 | 10.02 | 10.04 | 10.10 | 9.58 | 9.72 | 9.58 | 9.62 | 9.66 | 9.86 | 10.00 | 9.60 | 9.68 | 9.86 | 10.04 | 9.62 | 9.66 | 9.84 | 10.00 | 9.64 |
| 7  | 9.74 | 9.84 | 9.64 | 9.78 | 9.78 | 9.96 | 10.08 | 10.14 | 9.78 | 10.06 | 10.12 | 10.06 | 9.58 | 9.64 | 9.62 | 9.62 | 9.64 | 9.82 | 9.98  | 9.64 | 9.68 | 9.78 | 10.00 | 9.64 | 9.70 | 9.90 | 10.00 | 9.64 |
| 8  | 9.72 | 9.86 | 9.64 | 9.80 | 9.80 | 9.86 | 10.10 | 10.08 | 9.82 | 10.06 | 10.12 | 10.12 | 9.66 | 9.62 | 9.64 | 9.68 | 9.64 | 9.84 | 10.02 | 9.70 | 9.70 | 9.86 | 9.98  | 9.68 | 9.74 | 9.84 | 9.92  | 9.70 |
| 9  | 9.64 | 9.90 | 9.52 | 9.74 | 9.82 | 9.94 | 10.04 | 10.16 | 9.78 | 10.00 | 10.06 | 10.20 | 9.54 | 9.68 | 9.72 | 9.68 | 9.68 | 9.86 | 9.90  | 9.70 | 9.72 | 9.92 | 9.90  | 9.68 | 9.66 | 9.86 | 9.98  | 9.68 |
| 10 | 9.76 | 9.80 | 9.62 | 9.74 | 9.84 | 9.86 | 9.98  | 10.12 | 9.82 | 10.04 | 10.14 | 10.08 | 9.70 | 9.70 | 9.64 | 9.66 | 9.66 | 9.80 | 9.98  | 9.68 | 9.76 | 9.82 | 10.00 | 9.68 | 9.62 | 9.82 | 9.90  | 9.68 |
